# Supplementary material for: Surface enrichment of Ir on the IrRu alloy for efficient and stable water oxidation catalysis in acid
Source: Royal Society of Chemistry journal article supplement (doi:10.1039/d2sc03947h), 2022-01-01
Supplement: d2sc03947h1.pdf [file d2sc03947h1.pdf]

## Supplementary Information

### Materials and methods

#### Chemicals

Commercial iridium oxide hydrate catalyst ( $\text{IrO}_2 \cdot x\text{H}_2\text{O}$ , 99.95% trace metals), titanium carbide (nanopowder, particle size  $< 200$  nm), ruthenium(IV) oxide ( $\text{RuO}_2$ , 99.95% trace metals), ruthenium black, perchloric acid ( $\text{HClO}_4$ , 99.99% trace metal basis), iridium(III) chloride ( $\text{IrCl}_3 \cdot x\text{H}_2\text{O}$ , 99.9% trace metal basis), ruthenium(III) chloride ( $\text{RuCl}_3$ , Ru content 45-55 wt.%), potassium hydroxide (KOH,  $\geq 99.99\%$  trace metals basis), isopropyl alcohol (IPA,  $\geq 99.5$  wt.%), ethylene glycol (ReagentPlus<sup>®</sup>,  $\geq 99$  wt.%), copper sulfate ( $\text{CuSO}_4$ , ReagentPlus<sup>®</sup>,  $\geq 99$  wt.%), and sulfuric acid ( $\text{H}_2\text{SO}_4$ , ACS reagent, 95.0-98.0 wt.%) were purchased from Sigma-Aldrich. Iridium black (99.95% trace metals basis) was obtained from Alfa Aesar. Nafion dispersion (5 wt.%, alcohol-based) was purchased from Fuel Cell Store (Texas, USA). All chemicals were used without further purification. Ultrapure water (18 M $\Omega$ /cm) used in all experiments was prepared by the Millipore system.

#### Synthesis of $\text{Ir}_x\text{Ru}_y/\text{TiC}$

In a typical synthesis, iridium(III) chloride hydrate, ruthenium(III) chloride, and 200 mg of TiC were dissolved in 50 mL ethylene glycol at room temperature in a beaker. The loading of Ir and Ru was set at 20 wt. % relative to TiC. The obtained mixture was stirred for 1 hour at a rotation speed of 800 rpm to form a uniform suspension. Subsequently, the suspension was heated over an oil bath filled with silicon oil for 5 hours at the same rotating speed and 170 °C. After the reaction, the product was washed with deionized water 5 times and harvested using a centrifuge, and then dried in a vacuum oven.

#### Physical characterization

X-ray diffraction (XRD) was performed on a Shimadzu XRD-6000 with Cu K $\alpha$  radiation (40 kV, 30 mA,  $\lambda = 1.5418\text{\AA}$ ). The morphological and structural information was examined by a JEOL JEMARM200F scanning transmission electron microscopy (STEM) with sub-angstrom-resolution (0.08 nm) equipped with an energy-dispersive X-ray spectroscopy (EDX) analyzer. Atomic resolution images were taken in the high-angle annular dark-field (HAADF-STEM) mode. Electron energy loss spectroscopy (EELS) spectra were collected using a Gatan imaging filter (Quantum 965).

X-ray absorption spectroscopy (XAS) was carried out in total-fluorescence-yield mode at ambient air with beamline of BL-12B2 ( $25 < E < 70$  keV, with a resolution of  $\Delta E/E \sim 10^{-4}$ ) in Spring-8, HARSI, Japan. X-ray absorption near-edge structure (XANES) and extended X-ray absorption fine structure

(EXAFS) were performed to examine the valence state and coordination environment. Energy scan range between 11,000 and 12,000 eV was used to measure the Ir spectra, and energy scan range between 21,800 and 22,800 eV was used to measure the Ru spectra. The wavelet transform of the EXAFS spectra was based on the Continuous Cauchy Wavelet Transform (CCWT) modulus.<sup>1,2</sup> The coordination fitting of EXAFS spectra was conducted by Athena software using the standard crystal structure file from American Mineralogist Crystal Structure Database.

### Electrochemical measurements

The OER performance of the as-prepared samples was measured in 0.1 M ultrapure HClO<sub>4</sub> solution based on a three-electrode configuration. A leak-free saturated calomel electrode (SCE) was used as the reference electrode and a Pt plate was used as the counter electrode. The electrochemical performance was examined on a glassy carbon rotating disk electrode (RDE, disk diameter = 5.5 mm, Pine Research Instrument). All electrochemical data were collected on a CHI 760e electrochemical workstation (CHI instrument). The loading amount of catalyst was kept as 100 μg/cm<sup>2</sup>. The OER polarization curves were measured in N<sub>2</sub> saturated 0.1 M ultrapure HClO<sub>4</sub> solution at a scan rate of 5 mV/s with a rotating speed of 1600 rpm. The current density was normalized to the electrode area of glassy carbon (GC). The stability tests were performed in 0.1 M HClO<sub>4</sub> solution at 10 mA/cm<sup>2</sup>.

The surface structure of Ir<sub>x</sub>Ru<sub>y</sub>/TiC after OER was characterized by electrochemical Cu stripping. The Ir<sub>x</sub>Ru<sub>y</sub>/TiC sample was first electrochemically reduced in 0.1 M H<sub>2</sub>SO<sub>4</sub> solution at 0.02 V vs. SCE and then moved into a mixed solution containing 0.05 M H<sub>2</sub>SO<sub>4</sub> and 1 mM CuSO<sub>4</sub> with potential held at 0.02 V vs. SCE for 100 s.<sup>2</sup> Afterwards, the catalyst was transferred into a Cu-free electrolyte and a cyclic voltammetry measurement was conducted.

### Computational details

A 2×2×1 supercell of bulk Ru with different ratios of Ir was used to model IrRu alloy. The calculated bulk structures and lattice parameters are shown in **Table S4**. Then the (101) surface of the expanded 2×2×2 supercell was built to simulate the IrRu alloy before electrocatalysis. The selected parameters of (101)-surface structures for Ir<sub>1</sub>Ru<sub>3</sub>, Ir<sub>1</sub>Ru<sub>1</sub>, Ir<sub>3</sub>Ru<sub>1</sub> and Ir are listed in **Table S5**. The slab consists of four atomic layers, where the bottom two were frozen while the remaining layers were allowed to relax. As shown in the experimental results (Figure 2e, S5 and Table S3), the surface was covered with Ir oxide while surface Ru had been etched into the solution during OER. Therefore, we built an IrO<sub>x</sub> cluster anchored on the (101)-surface of Ir<sub>x</sub>Ru<sub>y</sub> alloy with different Ir/Ru ratios to simulate the real active surfaces, as shown in **Figure S8**. All the supercell slabs were repeated periodically with a 15 Å vacuum layer between the images in the direction of the surface normal.

All DFT calculations were performed by using the spin-polarized Kohn-Sham formalism with the generalized gradient approximation (GGA) of Perdew-Burke-Ernzerhof (PBE),<sup>3</sup> as implemented in the Vienna Ab-initio Simulation Package (VASP version 5.4.4).<sup>4</sup> The valence electronic states of all atoms were expanded in a plane-wave basis set with a cutoff energy of 400 eV, and a Monkhorst-Pack  $3\times 3\times 1$  grid was used to sample the Brillouin zone. Atomic positions were optimized by using a conjugate gradient algorithm until the forces were less than  $0.03 \text{ eV \AA}^{-1}$  for all intermediates. Vibrational frequency analysis was performed and Gibbs free energy corrections were calculated by using VASPKIT 1.2.5.<sup>5</sup>

## Supplementary figures

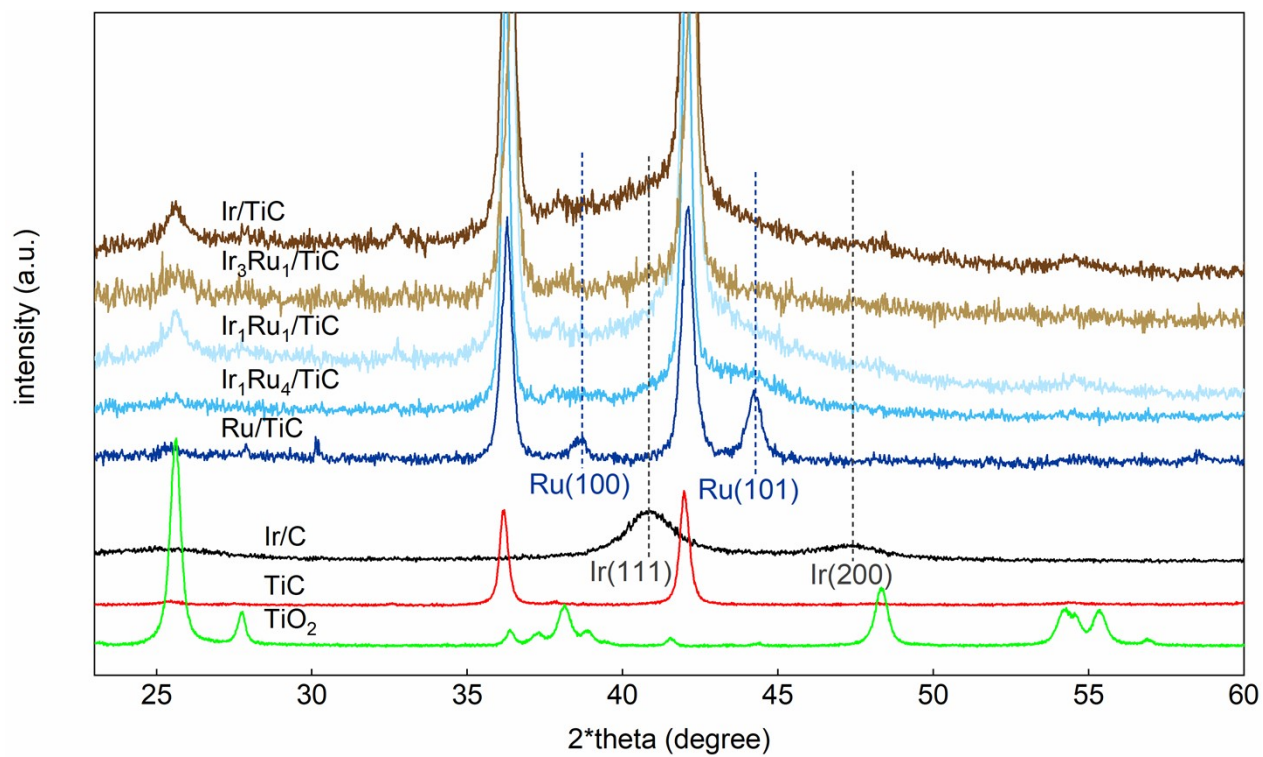

**Figure S1.** X-ray diffraction patterns of Ir<sub>x</sub>Ru<sub>y</sub>/TiC with different Ir/Ru ratios.

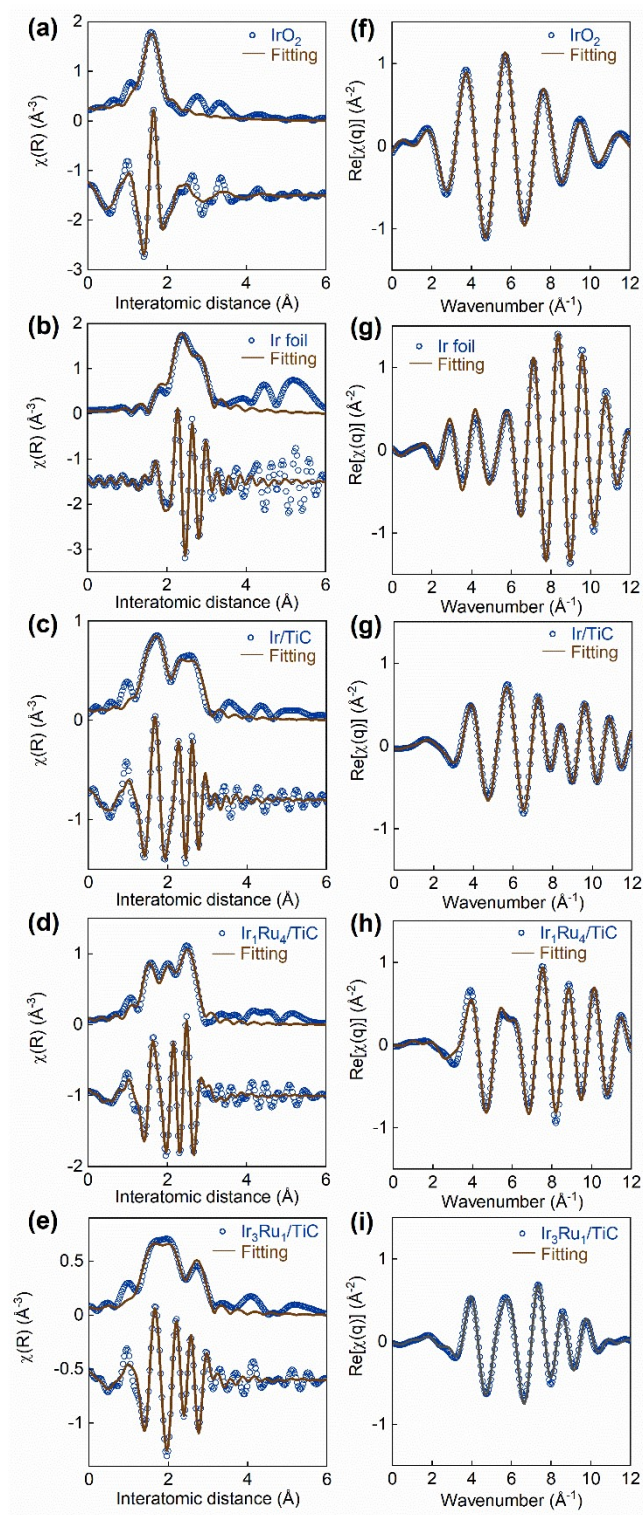

**Figure S2.** EXAFS fitting of Ir/TiC, IrO<sub>2</sub>, IrRu<sub>4</sub>/TiC, Ir<sub>3</sub>Ru<sub>1</sub>/TiC, and Ir foil. Left column: k<sub>2</sub>-weighted q-space spectra. Right column: k<sub>2</sub>-weighted k-space spectra.



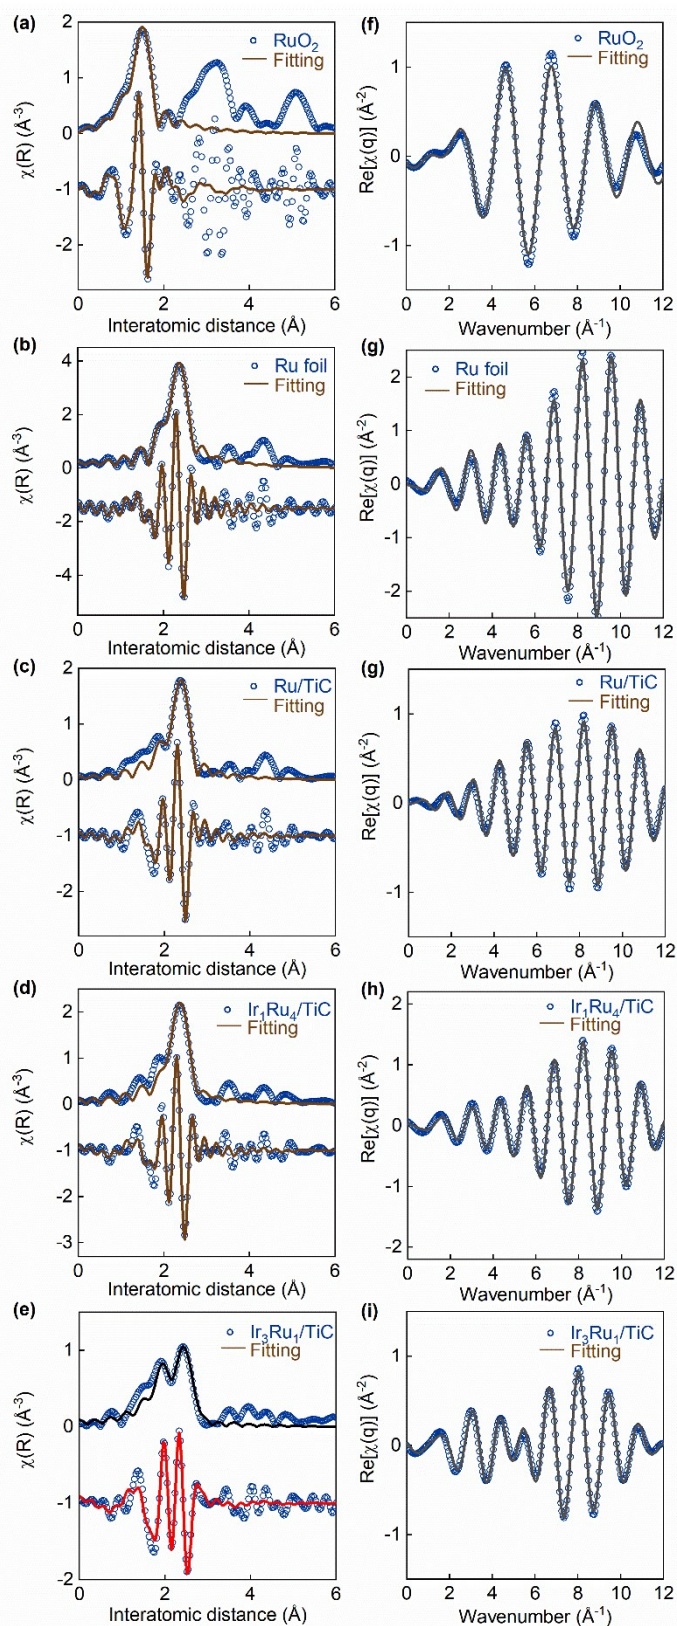

**Figure S3.** EXAFS fitting of Ru/TiC, RuO<sub>2</sub>, IrRu<sub>4</sub>/TiC, Ir<sub>3</sub>Ru<sub>1</sub>/TiC, and Ru foil. Left column: k<sub>2</sub>-weighted q-space spectra. Right column: k<sub>2</sub>-weighted k-space spectra.

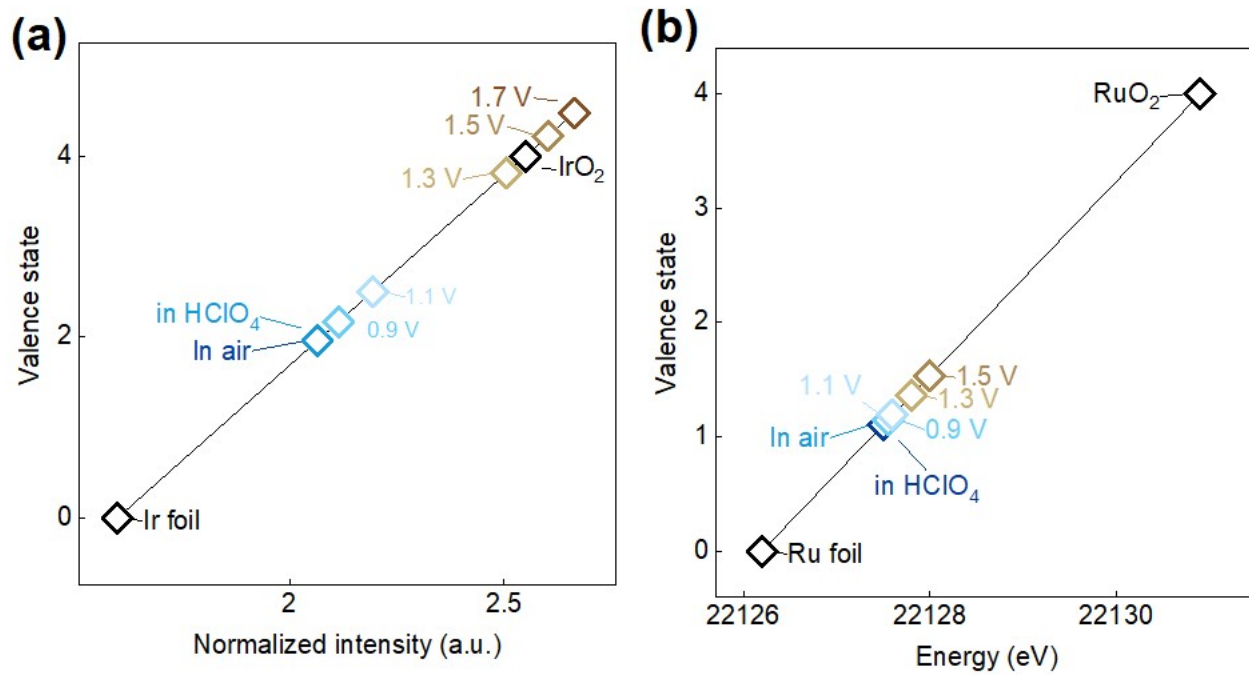

**Figure S4.** Normalized valence state change of (a) Ir and (b) Ru quantified from *in situ* EXAFS on Ir<sub>1</sub>Ru<sub>4</sub>/TiC for acidic OER.

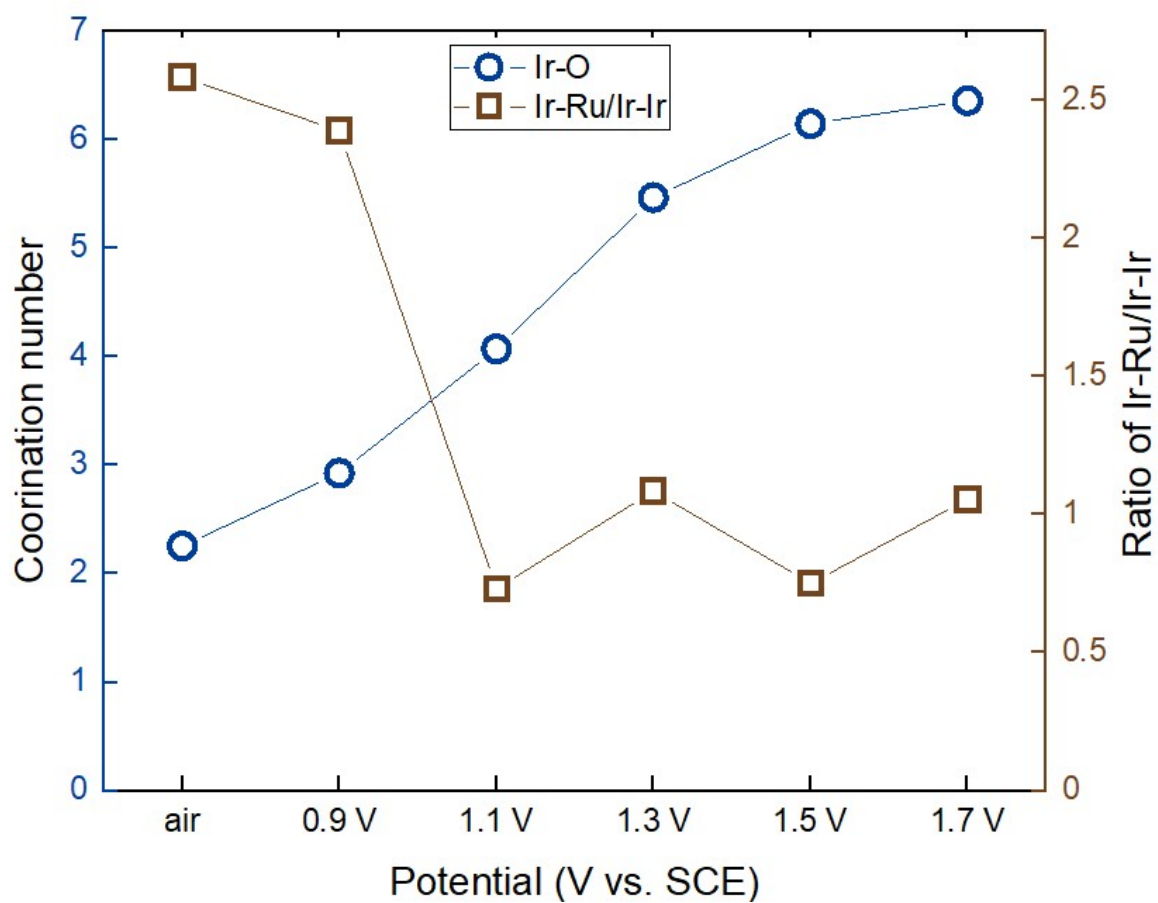

**Figure S5.** Evolution of Ir-O coordination and Ir-Ru/Ir-Ir ratio in Ir<sub>1</sub>Ru<sub>4</sub>/TiC as a function of applied potential.



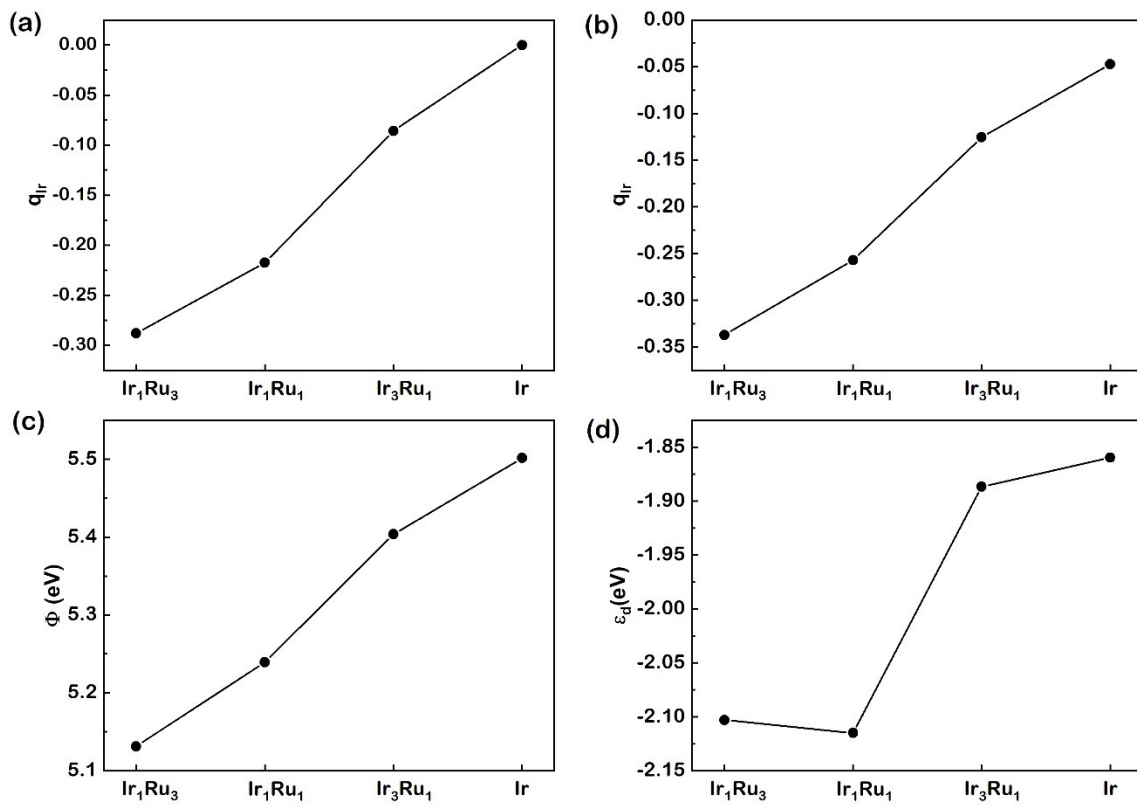

**Figure S6.** Bader charge of Ir atom for bulk (a) and (101)-surface (b) of Ir<sub>1</sub>Ru<sub>3</sub>, Ir<sub>1</sub>Ru<sub>1</sub> and Ir<sub>3</sub>Ru<sub>1</sub> alloy. (c) Work-function of (101)-surface for Ir<sub>1</sub>Ru<sub>3</sub>, Ir<sub>1</sub>Ru<sub>1</sub> and Ir<sub>3</sub>Ru<sub>1</sub> alloy. (d) *d*-band center of Ir atom on (101)-surface of Ir<sub>1</sub>Ru<sub>3</sub>, Ir<sub>1</sub>Ru<sub>1</sub> and Ir<sub>3</sub>Ru<sub>1</sub> alloy.

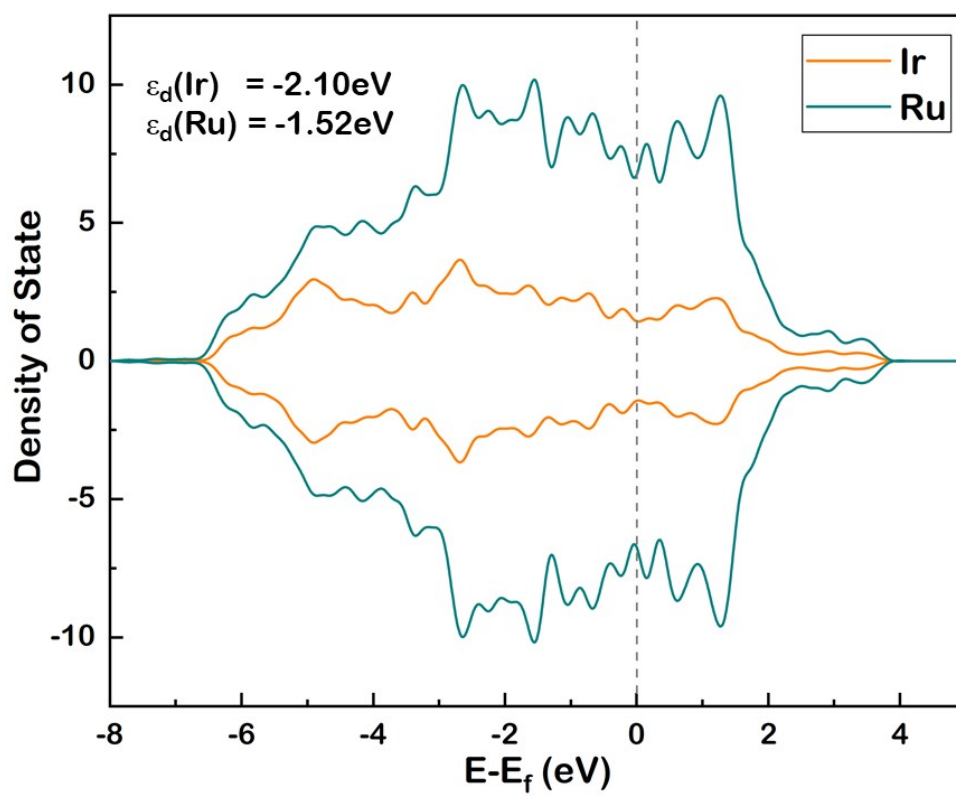

**Figure S7.** The projected density of state (pDOS) of surface Ru and Ir atoms for the Ir<sub>1</sub>Ru<sub>3</sub>(101) model.

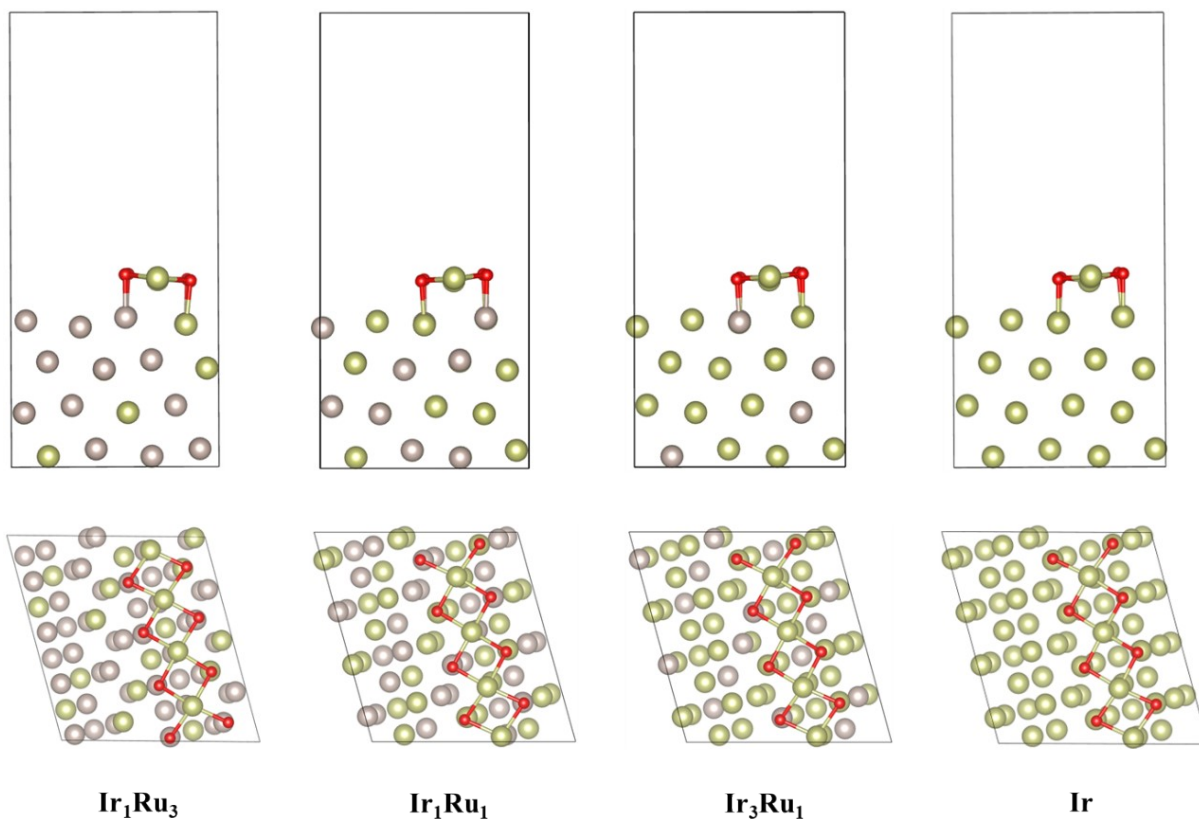

**Figure S8.** The computational models of  $\text{IrRu}_3$ ,  $\text{IrRu}$ ,  $\text{Ir}_3\text{Ru}$  and  $\text{Ir}$  for OER. The green, brown, and red spheres represent Ir, Ru and O, respectively.

## Supplementary tables

**Table S1.** Structural parameters of IrO<sub>2</sub>, Ir black, Ir/TiC, Ir<sub>1</sub>Ru<sub>4</sub>/TiC, and Ir<sub>3</sub>Ru<sub>1</sub>/TiC extracted from the EXAFS fitting for Ir centered scattering path (<sup>a</sup>S<sub>0</sub><sup>2</sup>=0.847).

| Sample                               | Scattering pair | <sup>b</sup> CN | <sup>d</sup> σ <sup>2</sup> (Å <sup>2</sup> ) | <sup>e</sup> ΔE <sub>0</sub> (eV) | <sup>f</sup> R factor | <sup>c</sup> R(Å) |
|--------------------------------------|-----------------|-----------------|-----------------------------------------------|-----------------------------------|-----------------------|-------------------|
| IrO <sub>2</sub>                     | Ir-O            | 6*              | 0.00539                                       | 12.164                            | 0.0377                | 1.9981            |
| Ir                                   | Ir-Ir           | 12*             | 0.00375                                       | 8.226                             | -0.01098              | 2.70392           |
| Ir/TiC                               | Ir-O            | 2.731           | 0.00507                                       | 10.991                            | 0.04539               | 2.00579           |
|                                      | Ir-Ir           | 4.926           | 0.00496                                       | 7.853                             | -0.03025              | 2.68466           |
| Ir <sub>1</sub> Ru <sub>4</sub> /TiC | Ir-O            | 2.652           | 0.00628                                       | 6.286                             | 0.00182               | 1.96222           |
|                                      | Ir-Ir           | 1.279           | 0.00032                                       | 6.286                             | -0.06567              | 2.64923           |
|                                      | Ir-Ru           | 3.543           | 0.00298                                       | 6.286                             | -0.02006              | 2.66324           |
| Ir <sub>3</sub> Ru <sub>1</sub> /TiC | Ir-O            | 1.967           | 0.00621                                       | 2.981                             | -0.00766              | 1.95274           |
|                                      | Ir-Ir           | 6.31            | 0.00621                                       | 2.981                             | -0.08126              | 2.64784           |
|                                      | Ir-Ru           | 1.561           | 0.00621                                       | 2.981                             | -0.09487              | 2.63593           |

<sup>a</sup>S<sub>0</sub><sup>2</sup> is the amplitude reduction factor (obtained by the fitting of Ir foil and IrO<sub>2</sub>);

<sup>b</sup>CN is the coordination number;

<sup>c</sup>R is the interatomic distance (the bond length between Ir central atoms and surrounding coordination atoms);

<sup>d</sup>σ<sup>2</sup> is Debye-Waller factor (a measure of thermal and static disorder in absorber-scatterer distances);

<sup>e</sup>ΔE<sub>0</sub> is edge-energy shift (the difference between the zero kinetic energy of the sample and that of the theoretical model);

<sup>f</sup>R factor is used to evaluate the goodness of fitting;

\*This value was fixed during EXAFS fitting, based on the known structure of Ir metal and bulk IrO<sub>2</sub>.

**Table S2.** Structural parameters of Ru black, RuO<sub>2</sub>, Ir<sub>1</sub>Ru<sub>4</sub>/TiC, Ir<sub>3</sub>Ru<sub>1</sub>/TiC, and Ru/TiC extracted from the EXAFS fitting for Ru centered scattering path ( $aS_0^2=0.85$ ).

| Sample                               | Scattering pair    | $bCN$ | $d\sigma^2(\text{\AA}^2)$ | $e\Delta E_0(\text{eV})$ | $fR$ factor | $eR(\text{\AA})$ |
|--------------------------------------|--------------------|-------|---------------------------|--------------------------|-------------|------------------|
| Ru                                   | Ru-Ru <sub>1</sub> | 6*    | 0.01459                   | -7.371                   | -0.01703    | 2.63257          |
|                                      | Ru-Ru <sub>2</sub> | 6*    | 4E-4                      | -7.371                   | -0.03542    | 2.66847          |
| RuO <sub>2</sub>                     | Ru-O               | 6*    | 0.00193                   | -1.306                   | 0.03382     | 1.97642          |
| Ir <sub>1</sub> Ru <sub>4</sub> /TiC | Ru-Ru              | 8.602 | 0.00584                   | -19.826                  | -0.05364    | 2.68606          |
| Ir <sub>3</sub> Ru <sub>1</sub> /TiC | Ru-Ru              | 5.857 | 0.00597                   | -19.308                  | -0.03376    | 2.70594          |
|                                      | Ru-Ir              | 5.8   | 0.0069                    | -20                      | -0.01972    | 2.71998          |
| Ru/TiC                               | Ru-Ru              | 6.66  | 0.00557                   | -6.333                   | 0.03624     | 2.68584          |

$aS_0^2$  is the amplitude reduction factor (obtained by the fitting of Ru foil and RuO<sub>2</sub>);

$bCN$  is the coordination number;

$eR$  is the interatomic distance (the bond length between Ir central atoms and surrounding coordination atoms);

$d\sigma^2$  is Debye-Waller factor (a measure of thermal and static disorder in absorber-scatterer distances);

$e\Delta E_0$  is edge-energy shift (the difference between the zero kinetic energy of the sample and that of the theoretical model);

$fR$  factor is used to evaluate the goodness of fitting;

\*This value was fixed during EXAFS fitting, based on the known structure of Ru metal and bulk RuO<sub>2</sub>.

**Table S3.** Structural parameters of Ir<sub>1</sub>Ru<sub>4</sub>/TiC extracted from the *in situ* EXAFS fitting for Ir centered scattering path ( $aS_0^2=0.85$ ).

| Sample          | Scattering pair | $bCN$ | $d\sigma^2(\text{\AA}^2)$ | $e\Delta E_0(\text{eV})$ | $fR$ factor | $cR(\text{\AA})$ | Figure |
|-----------------|-----------------|-------|---------------------------|--------------------------|-------------|------------------|--------|
| In air at OCP   | Ir-O            | 2.256 | 0.0034                    | 7.033                    | -0.05263    | 1.98067          |        |
|                 | Ir-Ir           | 1.118 | -0.00215                  | 7.033                    | -0.07325    | 2.65066          |        |
|                 | Ir-Ru           | 2.888 | 0.0012                    | 7.033                    | -0.06134    | 2.66246          |        |
| 0.9 V (vs. RHE) | Ir-O            | 2.928 | 0.00453                   | 10.079                   | -0.0324     | 2.0009           |        |
|                 | Ir-Ir           | 1.637 | 0.00453                   | 33.153                   | 0.07394     | 2.79784          |        |
|                 | Ir-Ru           | 3.911 | 0.00453                   | 10.079                   | -0.03568    | 2.68812          |        |
| 1.1 V (vs. RHE) | Ir-O            | 4.07  | 0.00605                   | 8.461                    | -0.06198    | 1.97132          |        |
|                 | Ir-Ir           | 2.333 | 0.00605                   | -10.936                  | -0.2562     | 2.4677           |        |
|                 | Ir-Ru           | 1.707 | 0.00605                   | 8.461                    | -0.02437    | 2.69943          |        |
| 1.3 V (vs. RHE) | Ir-O            | 5.466 | 0.00609                   | 9.051                    | -0.06672    | 1.96658          |        |
|                 | Ir-Ir           | 1.541 | 0.00609                   | 35.433                   | 0.09268     | 2.81658          |        |
|                 | Ir-Ru           | 1.671 | 0.00609                   | 9.051                    | -0.03846    | 2.68534          |        |
| 1.5 V (vs. RHE) | Ir-O            | 6.148 | 0.0068                    | 8.181                    | -0.07398    | 1.95932          |        |
|                 | Ir-Ir           | 1.781 | 0.0068                    | 37.982                   | 0.13136     | 2.85526          |        |
|                 | Ir-Ru           | 1.338 | 0.0068                    | 8.181                    | -0.03583    | 2.68797          |        |
| 1.7 V (vs. RHE) | Ir-O            | 6.359 | 0.00679                   | 8.985                    | -0.06483    | 1.96847          |        |
|                 | Ir-Ir           | 1.697 | 0.00679                   | -2.524                   | -0.29167    | 2.43223          |        |
|                 | Ir-Ru           | 1.79  | 0.00679                   | -2.524                   | -0.01037    | 2.71343          |        |

$aS_0^2$  is the amplitude reduction factor (obtained by the fitting of Ir foil and IrO<sub>2</sub>);

$bCN$  is the coordination number;

$cR$  is the interatomic distance (the bond length between Ir central atoms and surrounding coordination atoms);

$d\sigma^2$  is Debye-Waller factor (a measure of thermal and static disorder in absorber-scatterer distances);

$e\Delta E_0$  is edge-energy shift (the difference between the zero kinetic energy of the sample and that of the theoretical model);

$fR$  factor is used to evaluate the goodness of fitting;

\*This value was fixed during EXAFS fitting, based on the known structure of Ir metal and bulk IrO<sub>2</sub>.



**Table S4.** The calculated bulk structures and lattice parameters for IrRu alloy. The green and brown spheres represent Ir and Ru, respectively.

| Model                    | Structure | Lattice Parameters                                                                                            |
|--------------------------|-----------|---------------------------------------------------------------------------------------------------------------|
| $\text{Ir}_1\text{Ru}_3$ |           | $A = B = 5.454 \text{ \AA}$<br>$C = 4.311 \text{ \AA}$<br>$\alpha = \beta = 90^\circ$<br>$\gamma = 120^\circ$ |
| $\text{Ir}_1\text{Ru}_1$ |           | $A = B = 5.478 \text{ \AA}$<br>$C = 4.341 \text{ \AA}$<br>$\alpha = \beta = 90^\circ$<br>$\gamma = 120^\circ$ |
| $\text{Ir}_3\text{Ru}_1$ |           | $A = B = 5.486 \text{ \AA}$<br>$C = 4.398 \text{ \AA}$<br>$\alpha = \beta = 90^\circ$<br>$\gamma = 120^\circ$ |

**Table S5.** The selected parameters of (101)-surface structures for Ir<sub>1</sub>Ru<sub>3</sub>, Ir<sub>1</sub>Ru<sub>1</sub>, Ir<sub>3</sub>Ru<sub>1</sub> and Ir. The green and brown spheres represent Ir and Ru, respectively.

| Model                                 | Structure                                                                           | Lattice Parameters                                                                                                                                       |
|---------------------------------------|-------------------------------------------------------------------------------------|----------------------------------------------------------------------------------------------------------------------------------------------------------|
| Ir <sub>1</sub> Ru <sub>3</sub> (101) | 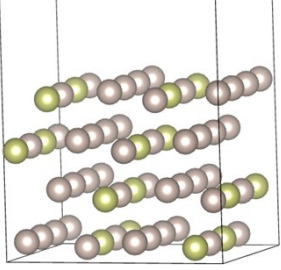   | $A = 10.203 \text{ \AA}$<br>$B = 10.909 \text{ \AA}$<br>$C = 21.564 \text{ \AA}$<br>$\alpha = 90^\circ$<br>$\beta = 90^\circ$<br>$\gamma = 105.52^\circ$ |
| Ir <sub>1</sub> Ru <sub>1</sub> (101) |    | $A = 10.265 \text{ \AA}$<br>$B = 10.955 \text{ \AA}$<br>$C = 21.592 \text{ \AA}$<br>$\alpha = 90^\circ$<br>$\beta = 90^\circ$<br>$\gamma = 105.52^\circ$ |
| Ir <sub>3</sub> Ru <sub>1</sub> (101) |  | $A = 10.367 \text{ \AA}$<br>$B = 10.972 \text{ \AA}$<br>$C = 21.623 \text{ \AA}$<br>$\alpha = 90^\circ$<br>$\beta = 90^\circ$<br>$\gamma = 105.35^\circ$ |
| Ir (101)                              |  | $A = 10.476 \text{ \AA}$<br>$B = 10.993 \text{ \AA}$<br>$C = 21.649 \text{ \AA}$<br>$\alpha = 90^\circ$<br>$\beta = 90^\circ$<br>$\gamma = 105.21^\circ$ |

**Table S6.** Comparison of OER performance in acid.

| Sample                                                               | Potential (V vs. RHE) @ 10 mA/cm <sup>2</sup> | Current density @ 1.45 V vs. RHE | Current density @ 1.5 V vs. RHE | Stability @ 10 mA/cm <sup>2</sup> | Catalyst loading amount μg/cm <sup>2</sup> | V vs. RHE @ 2 h | Ref.      |
|----------------------------------------------------------------------|-----------------------------------------------|----------------------------------|---------------------------------|-----------------------------------|--------------------------------------------|-----------------|-----------|
| Ir <sub>1</sub> Ru <sub>4</sub> /TiC                                 | 1.465                                         | 4.3                              | 45                              | 2.5 mV/h                          | 100                                        | 1.465           | This work |
| Au@AuIr <sub>2</sub>                                                 | 1.55                                          | 0.4                              | 2.05                            | 3.35 mV/h                         | 60                                         | 1.57            | 6         |
| Defect rich RuO <sub>2</sub>                                         | 1.44                                          | 20                               |                                 | 8.3 mV/h                          | 125                                        | 1.47            | 7         |
| Ir-NSG                                                               | 1.5                                           | 2.5                              | 12                              |                                   | 22                                         |                 | 8         |
| IrW alloy                                                            | 1.535                                         | 0.35                             | 2                               | 0.25 mV/h                         | 41.25                                      | 1.57            | 9         |
| IrO <sub>2</sub> /TiN                                                | 1.535                                         |                                  | 4                               |                                   | 77.5                                       | 1.64            | 10        |
| Ru <sub>1</sub> /PtCu                                                | 1.46                                          | 8                                | 48                              | 2.1 mV/h                          | 16.3                                       | 1.46            | 11        |
| Ir cluster/NG                                                        | 1.54                                          |                                  | 4.5                             | 1.5 mV/h (20 mA/cm <sup>2</sup> ) | 23                                         | 1.585 @20 mA    | 12        |
| Sr <sub>2</sub> IrO <sub>4</sub>                                     | 1.52                                          |                                  | 6                               | 9 mV/h                            | 80                                         | 1.573           | 13        |
| Co-RuIr                                                              | 1.465                                         | 6.5                              |                                 | 6 mV/h                            | 8.9                                        | 1.59            | 14        |
| Ru@IrO <sub>x</sub>                                                  | 1.515                                         | 1.8                              | 7                               |                                   | 10                                         | 1.51            | 15        |
| Li-IrO <sub>x</sub>                                                  | 1.53                                          |                                  | 5.5                             | 7.5 mV/h                          | 125                                        | 1.58            | 16        |
| Nanoporous dtf-IrNi (From IrNiOs)                                    | 1.513                                         |                                  |                                 |                                   |                                            |                 | 17        |
| Cr <sub>0.6</sub> Ru <sub>0.4</sub> O <sub>2</sub>                   | 1.41                                          | 37                               |                                 | 7 mV/h                            | 151.05                                     | 1.44            | 18        |
| Ir <sub>0.7</sub> Ru <sub>0.3</sub> O <sub>2</sub> nanoneedle        | 1.4 (3D)                                      |                                  |                                 |                                   |                                            |                 | 19        |
| IrRu <sub>4</sub> /GKB                                               | 1.6                                           |                                  |                                 |                                   |                                            |                 | 20        |
| Ir/TiC                                                               | 1.495                                         | 2.8                              | 12                              | 5 mV/h                            | 227                                        | 1.52            | 21        |
| Y <sub>2</sub> [Ru <sub>1.6</sub> Y <sub>0.4</sub> ]O <sub>7-d</sub> | 1.48                                          | 2.5                              | 17                              |                                   | 25                                         |                 | 22        |
| IrRu alloy/Cu <sub>2-x</sub> S @IrS <sub>y</sub>                     | 1.47                                          | 7.6                              | 35                              | 0.3 mV/h (5 mA/cm <sup>2</sup> )  | 100                                        | 1.555           | 23        |
| IrO <sub>x</sub> /SrIrO <sub>3</sub>                                 | 1.525 @ 2 h activation                        | 0.1                              | 3                               | -1 mV/h                           |                                            | 1.53            | 24        |
| IrO <sub>x</sub> /ATO                                                | 1.49                                          |                                  | 22                              | 4 mV/h (1 mA/cm <sup>2</sup> )    | 10.2                                       | 1.55            | 25        |

| Sample                                                                                                                 | Potential (V vs. RHE) @ 10 mA/cm <sup>2</sup> | Current density @ 1.45 V vs. RHE | Current density @ 1.5 V vs. RHE | Stability @ 10 mA/cm <sup>2</sup> | Catalyst loading amount μg/cm <sup>2</sup> | V vs. RHE @ 2 h | Ref. |
|------------------------------------------------------------------------------------------------------------------------|-----------------------------------------------|----------------------------------|---------------------------------|-----------------------------------|--------------------------------------------|-----------------|------|
| IrO <sub>x</sub> -Ir/C                                                                                                 | 1.52                                          | 0.3                              | 3.5                             | Device, 100 h                     |                                            |                 | 26   |
| IrNi @IrO <sub>x</sub>                                                                                                 | 1.54                                          |                                  | 1.8                             |                                   |                                            |                 | 27   |
| (Na <sub>0.33</sub> Ce <sub>0.67</sub> ) <sub>2</sub> (Ir <sub>1-x</sub> Ru <sub>x</sub> ) <sub>2</sub> O <sub>7</sub> | 1.43                                          |                                  |                                 |                                   |                                            |                 | 28   |
| IrO <sub>x</sub> core-shell                                                                                            |                                               |                                  |                                 | 7 mV/h (1 mA/cm <sup>2</sup> )    |                                            | 1.535 @1 mA     | 29   |

## References

- Muñoz, M.; Argoul, P.; Farges, F., Continuous Cauchy wavelet transform analyses of EXAFS spectra: A qualitative approach. *Am. Mineral.* **2003**, *88* (4), 694-700.
- Muoz, M.; Farges, F.; Argoul, P., Continuous Cauchy wavelet transform of XAFS spectra. *Phys. Scr.* **2005**, 221-222.
- Perdew, J. P.; Burke, K.; Ernzerhof, M., Generalized gradient approximation made simple. *Phys. Rev. Lett.* **1996**, *77* (18), 3865-3868.
- Kresse, G.; Furthmüller, J., Efficient iterative schemes for ab initio total-energy calculations using a plane-wave basis set. *Phys. Rev. B Condens. Matter.* **1996**, *54* (16), 11169-11186.
- Wang, V.; Xu, N.; Liu, J.-C.; Tang, G.; Geng, W.-T., VASPKIT: A user-friendly interface facilitating high-throughput computing and analysis using VASP code. *Comput. Phys. Commun.* **2021**, *267*, 108033.
- Wang, H.; Chen, Z. N.; Wu, D.; Cao, M.; Sun, F.; Zhang, H.; You, H.; Zhuang, W.; Cao, R., Significantly Enhanced Overall Water Splitting Performance by Partial Oxidation of Ir through Au Modification in Core-Shell Alloy Structure. *J. Am. Chem. Soc.* **2021**, *143* (12), 4639-4645.
- Zhao, Z. L.; Wang, Q.; Huang, X.; Feng, Q.; Gu, S.; Zhang, Z.; Xu, H.; Zeng, L.; Gu, M.; Li, H., Boosting the oxygen evolution reaction using defect-rich ultra-thin ruthenium oxide nanosheets in acidic media. *Energy Environ. Sci.* **2020**, 5143-5151.
- Wang, Q.; Xu, C. Q.; Liu, W.; Hung, S. F.; Bin Yang, H.; Gao, J.; Cai, W.; Chen, H. M.; Li, J.; Liu, B., Coordination engineering of iridium nanocluster bifunctional electrocatalyst for highly efficient and pH-universal overall water splitting. *Nat. Commun.* **2020**, *11* (1), 4246.
- Gao, J.; Huang, X.; Cai, W.; Wang, Q.; Jia, C.; Liu, B., Rational design of an iridium-tungsten composite with an iridium-rich surface for acidic water oxidation. *ACS. Appl. Mater. Inter.* **2020**, *12* (23), 25991-26001.
- Zhang, K.; Mai, W.; Li, J.; Wang, H.; Li, G.; Hu, W., Highly scattered Ir oxides on TiN as an efficient oxygen evolution reaction electrocatalyst in acidic media. *J. Mater. Sci.* **2019**, *55* (8), 3507-3520.
- Yao, Y.; Hu, S.; Chen, W.; Huang, Z.-Q.; Wei, W.; Yao, T.; Liu, R.; Zang, K.; Wang, X.; Wu, G.; Yuan, W.; Yuan, T.; Zhu, B.; Liu, W.; Li, Z.; He, D.; Xue, Z.; Wang, Y.; Zheng, X.; Dong, J.; Chang, C.-R.; Chen, Y.; Hong, X.; Luo, J.; Wei, S.; Li, W.-X.; Strasser, P.; Wu, Y.; Li, Y., Engineering the electronic structure of single atom Ru sites via compressive strain boosts acidic water oxidation electrocatalysis. *Nat. Catal.* **2019**, *2*, 304-313.

12. Wu, X.; Feng, B.; Li, W.; Niu, Y.; Yu, Y.; Lu, S.; Zhong, C.; Liu, P.; Tian, Z.; Chen, L.; Hu, W.; Li, C. M., Metal-support interaction boosted electrocatalysis of ultrasmall iridium nanoparticles supported on nitrogen doped graphene for highly efficient water electrolysis in acidic and alkaline media. *Nano Energy* **2019**, *62*, 117-126.
13. Strickler, A. L.; Higgins, D.; Jaramillo, T. F., Crystalline strontium iridate particle catalysts for enhanced oxygen evolution in acid. *ACS Appl. Energy Mater.* **2019**, *2* (8), 5490-5498.
14. Shan, J.; Ling, T.; Davey, K.; Zheng, Y.; Qiao, S. Z., Transition-metal-doped ruiir bifunctional nanocrystals for overall water splitting in acidic environments. *Adv. Mater.* **2019**, *31* (17), e1900510.
15. Shan, J.; Guo, C.; Zhu, Y.; Chen, S.; Song, L.; Jaroniec, M.; Zheng, Y.; Qiao, S.-Z., Charge-redistribution-enhanced nanocrystalline Ru@IrOx electrocatalysts for oxygen evolution in acidic media. *Chem* **2019**, *5* (2), 445-459.
16. Gao, J.; Xu, C. Q.; Hung, S. F.; Liu, W.; Cai, W.; Zeng, Z.; Jia, C.; Chen, H. M.; Xiao, H.; Li, J.; Huang, Y.; Liu, B., Breaking long-range order in iridium oxide by alkali ion for efficient water oxidation. *J. Am. Chem. Soc.* **2019**, *141* (7), 3014-3023.
17. Park, S.-A.; Shim, K.; Kim, K.-S.; Moon, Y. H.; Kim, Y.-T., Enhanced activity for oxygen evolution reaction of nanoporous irni thin film formed by electrochemical selective etching process. *J. Electrochem. Sci. Technol.* **2019**, *10* (4), 402-407.
18. Lin, Y.; Tian, Z.; Zhang, L.; Ma, J.; Jiang, Z.; Deibert, B. J.; Ge, R.; Chen, L., Chromium-ruthenium oxide solid solution electrocatalyst for highly efficient oxygen evolution reaction in acidic media. *Nat. Commun.* **2019**, *10* (1), 162.
19. Faustini, M.; Giraud, M.; Jones, D.; Rozière, J.; Dupont, M.; Porter, T. R.; Nowak, S.; Bahri, M.; Ersen, O.; Sanchez, C.; Boissière, C.; Tard, C.; Peron, J., Hierarchically structured ultraporous iridium-based materials: A novel catalyst architecture for proton exchange membrane water electrolyzers. *Adv. Energy Mater.* **2019**, *9* (4), 1802136.
20. You, E.; Min, M.; Jin, S.-A.; Kim, T.; Pak, C., Highly durable, cost-effective, and multifunctional carbon-supported IrRu-based catalyst for automotive polymer electrolyte fuel cell anodes. *J. Electrochem. Soc.* **2018**, *165* (6), F3094-F3099.
21. Li, G.; Li, K.; Yang, L.; Chang, J.; Ma, R.; Wu, Z.; Ge, J.; Liu, C.; Xing, W., Boosted performance of Ir species by employing tin as the support toward oxygen evolution reaction. *ACS. Appl. Mater. Inter.* **2018**, *10* (44), 38117-38124.
22. Kim, J.; Shih, P. C.; Qin, Y.; Al-Bardan, Z.; Sun, C. J.; Yang, H., A porous pyrochlore  $Y_2[\text{Ru}_{1.6}\text{Y}_{0.4}]\text{O}_{7-\delta}$  electrocatalyst for enhanced performance towards the oxygen evolution reaction in acidic media. *Angew. Chem. Int. Ed. Engl.* **2018**, *57* (42), 13877-13881.
23. Joo, J.; Jin, H.; Oh, A.; Kim, B.; Lee, J.; Baik, H.; Joo, S. H.; Lee, K., An IrRu alloy nanocactus on  $\text{Cu}_{2-x}\text{S}@\text{IrS}_y$  as a highly efficient bifunctional electrocatalyst toward overall water splitting in acidic electrolytes. *J. Mater. Chem. A* **2018**, *6* (33), 16130-16138.
24. Seitz, L. C.; Dickens, C. F.; Nishio, K.; Hikita, Y.; Montoya, J.; Doyle, A.; Kirk, C.; Vojvodic, A.; Hwang, H. Y.; Norskov, J. K.; Jaramillo, T. F., A highly active and stable IrOx/SrIrO<sub>3</sub> catalyst for the oxygen evolution reaction. *Science* **2016**, *353* (6303), 1011-1014.
25. Oh, H. S.; Nong, H. N.; Reier, T.; Bergmann, A.; Gliech, M.; Ferreira de Araujo, J.; Willinger, E.; Schlogl, R.; Teschner, D.; Strasser, P., Electrochemical catalyst-support effects and their stabilizing role for irox nanoparticle catalysts during the oxygen evolution reaction. *J. Am. Chem. Soc.* **2016**, *138* (38), 12552-12563.
26. Lettenmeier, P.; Wang, L.; Golla-Schindler, U.; Gazdzicki, P.; Canas, N. A.; Handl, M.; Hiesgen, R.; Hosseiny, S. S.; Gago, A. S.; Friedrich, K. A., Nanosized IrO<sub>x</sub>-Ir catalyst with relevant activity for anodes of proton exchange membrane electrolysis produced by a cost-effective procedure. *Angew. Chem. Int. Ed. Engl.* **2016**, *55* (2), 742-746.
27. Reier, T.; Pawolek, Z.; Cherevko, S.; Bruns, M.; Jones, T.; Teschner, D.; Selve, S.; Bergmann, A.; Nong, H. N.; Schlogl, R.; Mayrhofer, K. J.; Strasser, P., Molecular insight in structure and activity of highly efficient, low-Ir Ir-Ni oxide catalysts for electrochemical water splitting (OER). *J. Am. Chem. Soc.* **2015**, *137* (40), 13031-13040.

28. Sardar, K.; Petrucco, E.; Hiley, C. I.; Sharman, J. D.; Wells, P. P.; Russell, A. E.; Kashtiban, R. J.; Sloan, J.; Walton, R. I., Water-splitting electrocatalysis in acid conditions using ruthenate-iridate pyrochlores. *Angew. Chem. Int. Ed. Engl.* **2014**, *53* (41), 10960-10964.
29. Nong, H. N.; Gan, L.; Willinger, E.; Teschner, D.; Strasser, P., IrOx core-shell nanocatalysts for cost- and energy-efficient electrochemical water splitting. *Chem. Sci.* **2014**, *5* (8), 2955-2963.
